# Supplementary material for: Therapeutic Effect of Costunolide in Autoimmune Hepatitis: Network Pharmacology and Experimental Validation
Source: MDPI journal article supplement (doi:10.3390/ph16020316), 2023-02-17
Supplement: s1 [file s1]

Supplementary Figures

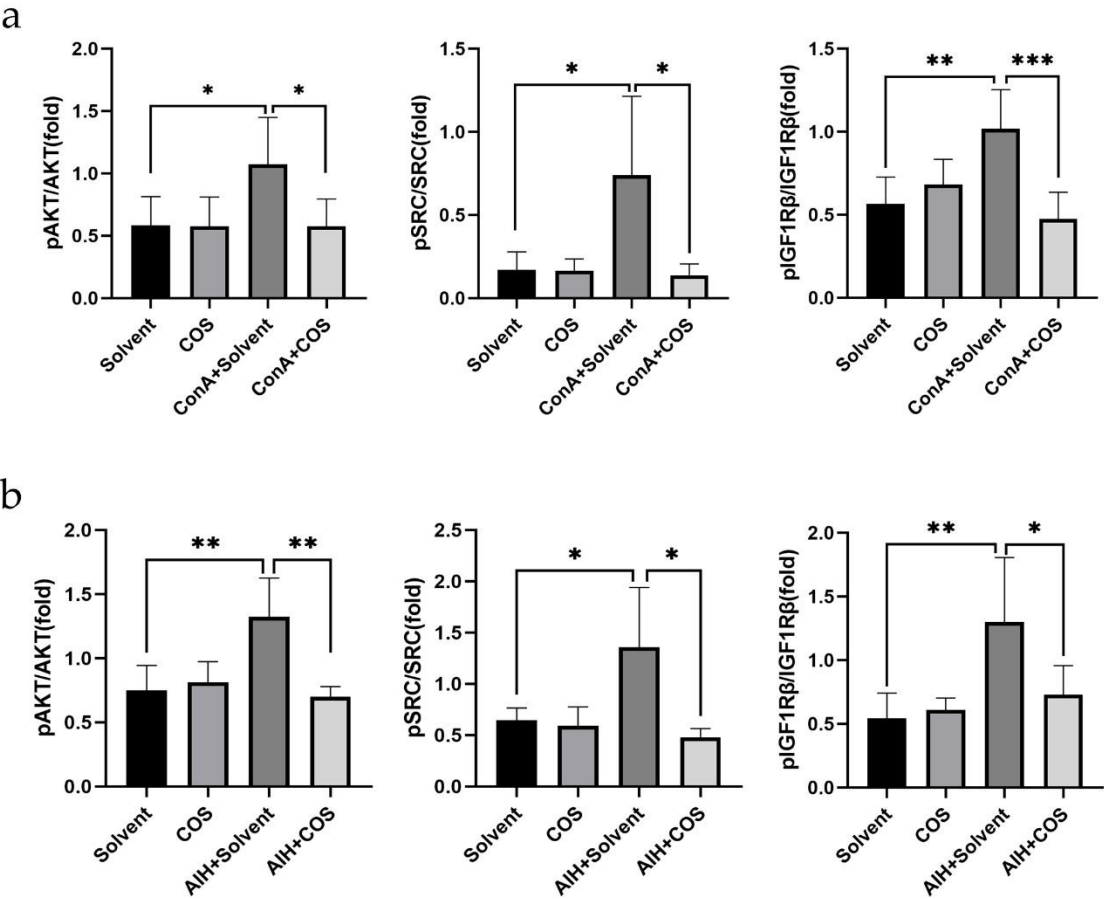

**Supplementary Figure S1.** (a) Protein expression fold in ConA-induced acute hepatitis. (b) Protein expression fold in chronic murine autoimmune hepatitis. \*  $p < 0.05$ , \*\*  $p < 0.01$ , \*\*\*  $p < 0.001$ .



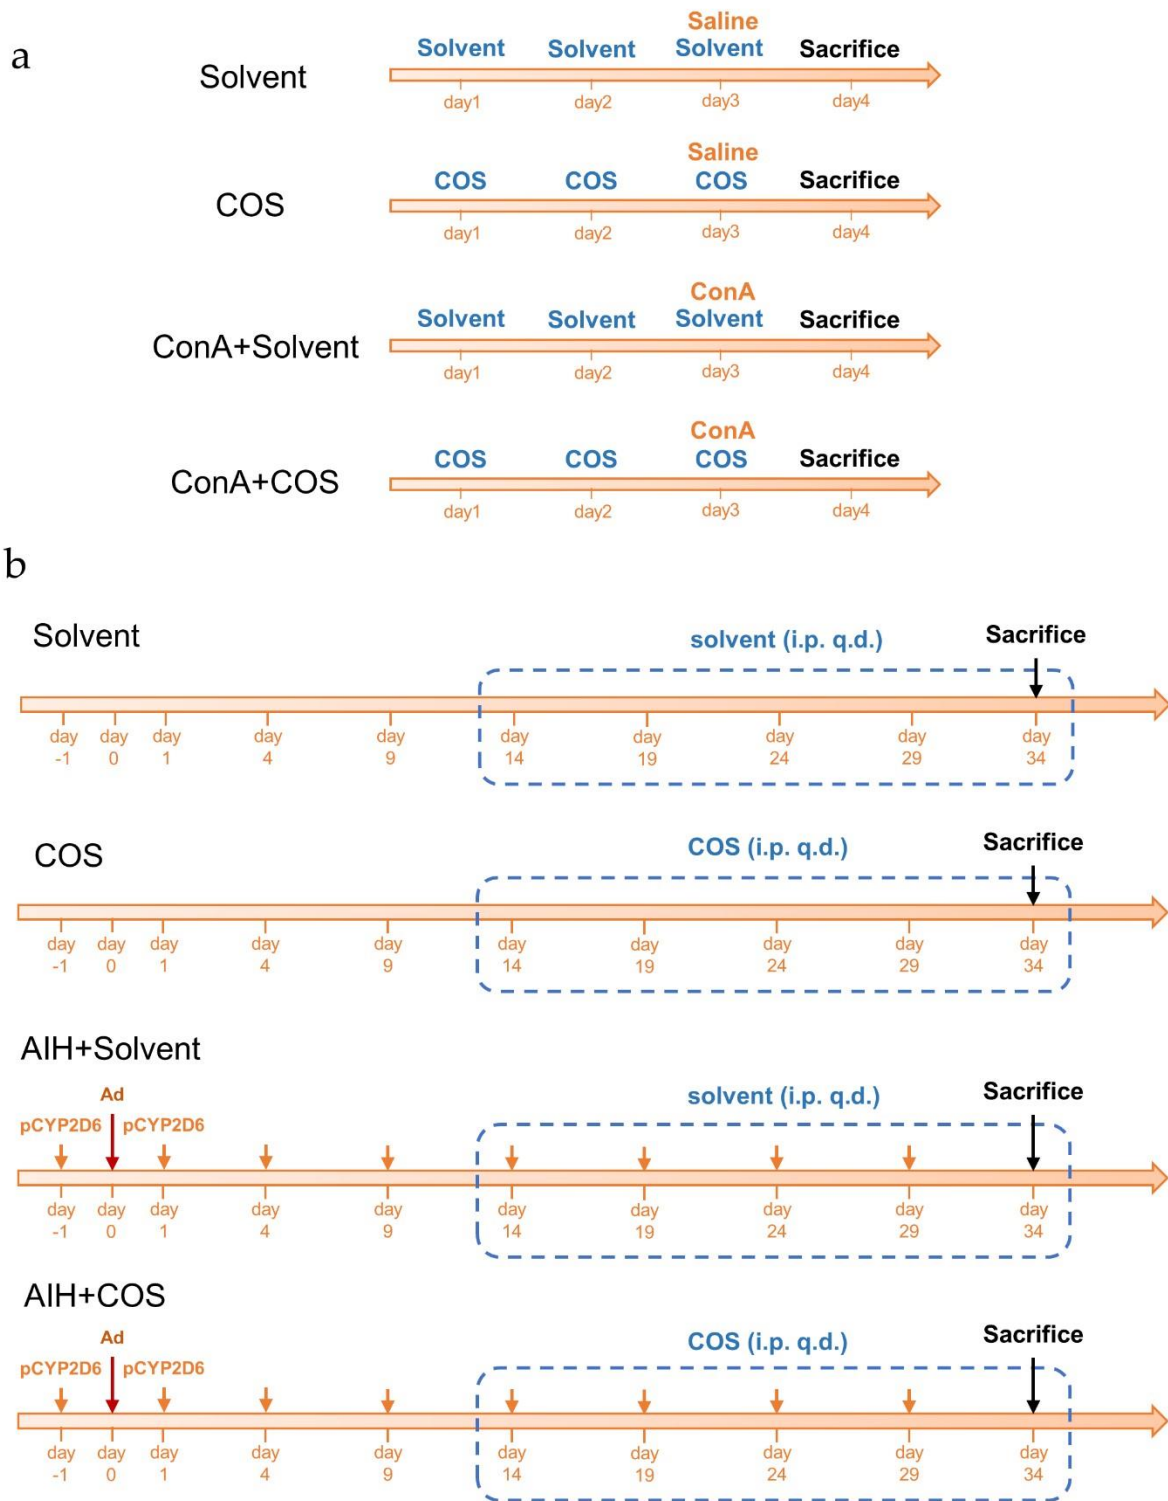

**Supplementary Figure S2.** Animal models and experimental design. (a) The ConA-induced acute hepatitis model. (b) The chronic murine autoimmune hepatitis model.
